# Supplementary material for: Microbial Community Structure and Bacterial Lineages Associated with Sulfonamides Resistance in Anthropogenic Impacted Larut River
Source: MDPI journal article supplement (doi:10.3390/w14071018), 2022-03-23
Supplement: s1 [file s1]

**Supplementary Table S1.** Summary of diversity and richness of microbial community.

| Site           | Reads  | OTUs | Shannon Index | Chao1 Index |
|----------------|--------|------|---------------|-------------|
| S1a            | 52,660 | 1034 | 3.86          | 1164        |
| Zoo            | 62,265 | 499  | 3.87          | 633         |
| Hospital       | 68,919 | 1227 | 4.91          | 1278        |
| Slaughterhouse | 51,039 | 1177 | 5.24          | 1254        |
| S1b            | 50,997 | 904  | 4.18          | 973         |
| S1c            | 57,927 | 1147 | 4.64          | 1186        |

**Supplementary Table S2.** Sulfonamides resistant bacteria identified to species level.

| <b>Genera</b>           | <b>Species</b>       | <b>Number</b> | <b>Percentage</b> |
|-------------------------|----------------------|---------------|-------------------|
| <i>Acinetobacter</i>    |                      | <b>25</b>     | <b>9.0</b>        |
|                         | <i>baumannii</i>     | 1             | 4.0               |
|                         | <i>beijerinckii</i>  | 1             | 4.0               |
|                         | <i>brisouii</i>      | 1             | 4.0               |
|                         | <i>haemolyticus</i>  | 1             | 4.0               |
|                         | <i>junii</i>         | 2             | 8.0               |
|                         | <i>parvus</i>        | 2             | 8.0               |
|                         | <i>seohaensis</i>    | 3             | 12.0              |
|                         | sp.                  | 10            | 40.0              |
|                         | <i>tjernbergiae</i>  | 3             | 12.0              |
|                         | <i>variabilis</i>    | 1             | 4.0               |
| <i>Aeromonas</i>        |                      | <b>5</b>      | <b>1.8</b>        |
|                         | <i>dhakensis</i>     | 1             | 20.0              |
|                         | <i>hydrophila</i>    | 2             | 40.0              |
|                         | sp.                  | 1             | 20.0              |
|                         | <i>veronii</i>       | 1             | 20.0              |
| <i>Alcaligenes</i>      |                      | <b>1</b>      | <b>0.4</b>        |
|                         | sp.                  | 1             | 100.0             |
| <i>Aquitalea</i>        |                      | <b>1</b>      | <b>0.4</b>        |
|                         | sp.                  | 1             | 100.0             |
| <i>Bacillus</i>         |                      | <b>13</b>     | <b>4.7</b>        |
|                         | <i>cereus</i>        | 3             | 23.1              |
|                         | sp.                  | 7             | 53.8              |
|                         | <i>thuringiensis</i> | 2             | 15.4              |
|                         | <i>toyonensis</i>    | 1             | 7.7               |
| <i>Chryseobacterium</i> |                      | <b>1</b>      | <b>0.4</b>        |
|                         | sp.                  | 1             | 100.0             |
| <i>Citrobacter</i>      |                      | <b>4</b>      | <b>1.4</b>        |
|                         | <i>farmeri</i>       | 1             | 25.0              |
|                         | <i>freundii</i>      | 3             | 75.0              |
| <i>Comamonas</i>        |                      | <b>7</b>      | <b>2.5</b>        |
|                         | <i>aquatica</i>      | 1             | 14.3              |
|                         | sp.                  | 6             | 85.7              |
| <i>Delftia</i>          |                      | <b>2</b>      | <b>0.7</b>        |
|                         | <i>litopenaei</i>    | 1             | 50.0              |
|                         | sp.                  | 1             | 50.0              |
| <i>Elizabethkingia</i>  |                      | <b>1</b>      | <b>0.4</b>        |
|                         | <i>anopheles</i>     | 1             | 100.0             |

**Table S2, continued**

| <b>Genera</b>           | <b>Species</b>      | <b>Number</b> | <b>Percentage</b> |
|-------------------------|---------------------|---------------|-------------------|
| <i>Enterobacter</i>     |                     | <b>20</b>     | <b>7.2</b>        |
|                         | <i>aerogenes</i>    | 1             | 5.0               |
|                         | <i>cloacae</i>      | 13            | 65.0              |
|                         | <i>hormaechei</i>   | 1             | 5.0               |
|                         | <i>kobei</i>        | 2             | 10.0              |
|                         | sp.                 | 3             | 15.0              |
| <i>Escherichia</i>      |                     | <b>36</b>     | <b>12.9</b>       |
|                         | <i>coli</i>         | 34            | 94.4              |
|                         | sp.                 | 2             | 5.6               |
| <i>Exiguobacterium</i>  |                     | <b>2</b>      | <b>0.7</b>        |
|                         | <i>indicum</i>      | 2             | 100.0             |
| <i>Klebsiella</i>       |                     | <b>123</b>    | <b>44.2</b>       |
|                         | <i>pneumoniae</i>   | 114           | 92.7              |
|                         | sp.                 | 7             | 5.7               |
|                         | <i>variicola</i>    | 2             | 1.6               |
| <i>Kocuria</i>          |                     | <b>1</b>      | <b>0.4</b>        |
|                         | sp.                 | 1             | 100.0             |
| <i>Macrococcus</i>      |                     | <b>2</b>      | <b>0.7</b>        |
|                         | <i>caseolyticus</i> | 2             | 100.0             |
| <i>Micrococcus</i>      |                     | <b>1</b>      | <b>0.4</b>        |
|                         | sp.                 | 1             | 100.0             |
| <i>Pseudomonas</i>      |                     | <b>7</b>      | <b>2.5</b>        |
|                         | <i>mosselii</i>     | 1             | 14.3              |
|                         | sp.                 | 6             | 85.7              |
| <i>Serratia</i>         |                     | <b>1</b>      | <b>0.4</b>        |
|                         | <i>marcescens</i>   | 1             | 100.0             |
| <i>Shewanella</i>       |                     | <b>1</b>      | <b>0.4</b>        |
|                         | sp.                 | 1             | 100.0             |
| <i>Shigella</i>         |                     | <b>1</b>      | <b>0.4</b>        |
|                         | sp.                 | 1             | 100.0             |
| <i>Soonwooa</i>         |                     | <b>1</b>      | <b>0.4</b>        |
|                         | <i>buanensis</i>    | 1             | 100.0             |
| <i>Stenotrophomonas</i> |                     | <b>2</b>      | <b>0.7</b>        |
|                         | sp.                 | 2             | 100.0             |
| Unassigned              |                     | <b>19</b>     | <b>6.8</b>        |
|                         | Unassigned          | 19            | 100.0             |
| <i>Wautersiella</i>     |                     | <b>1</b>      | <b>0.4</b>        |
|                         | <i>falsenni</i>     | 1             | 100.0             |
| <b>Total</b>            |                     | <b>278</b>    |                   |

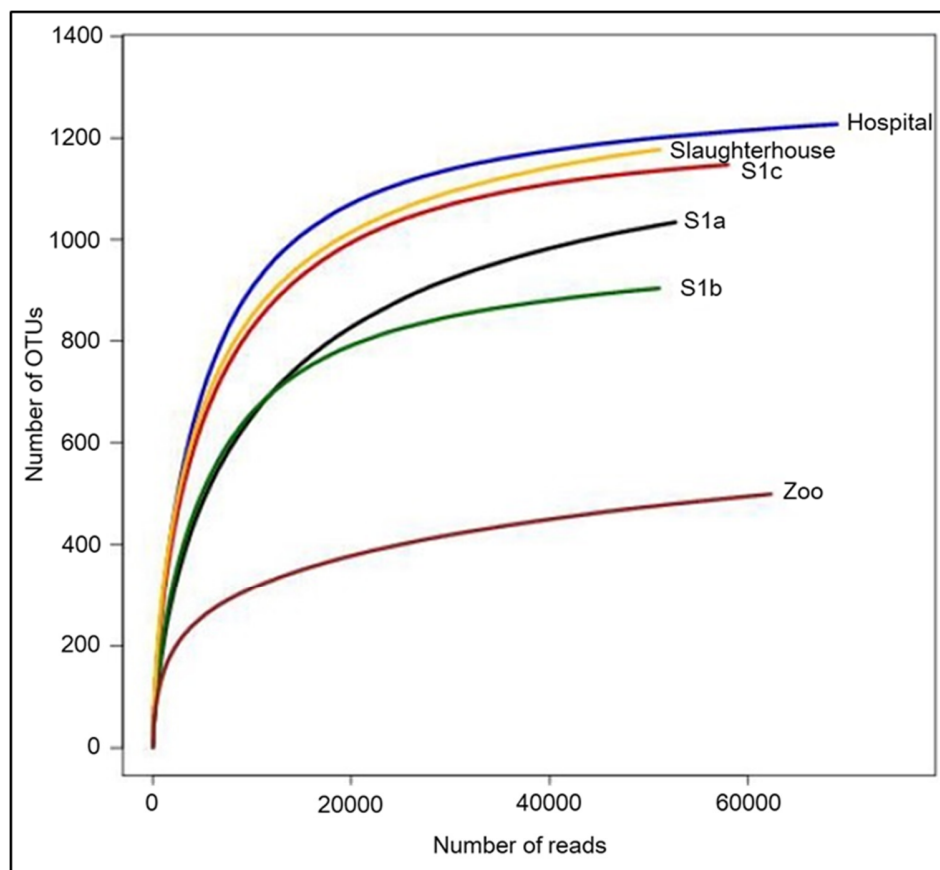

**Supplementary Figure S1.** Rarefaction curves estimates at 97% of microbial community.

**Supplementary Figure S2.** Bacterial genera detected by 16S rDNA metagenomics.

| Genus                     | S1a | Zoo  | Hospital | Slaughterhouse | S1b | S1c |
|---------------------------|-----|------|----------|----------------|-----|-----|
| <i>Acetitomaculum</i>     | 0.0 | 0.0  | 0.0      | 0.0            | 0.0 | 0.0 |
| <i>Acetoanaerobium</i>    | 0.0 | 0.0  | 0.0      | 0.3            | 0.0 | 0.0 |
| <i>Acetobacter</i>        | 0.0 | 0.0  | 0.0      | 0.0            | 0.0 | 0.0 |
| <i>Acholeplasma</i>       | 0.0 | 0.0  | 0.0      | 0.0            | 0.0 | 0.0 |
| <i>Acidaminobacter</i>    | 0.1 | 0.0  | 0.1      | 0.0            | 0.1 | 0.0 |
| <i>Acidaminococcus</i>    | 0.0 | 0.0  | 0.3      | 0.0            | 0.0 | 0.0 |
| <i>Acidibacter</i>        | 0.0 | 0.0  | 0.1      | 0.0            | 0.0 | 0.0 |
| <i>Acidomonas</i>         | 0.0 | 0.0  | 0.0      | 0.0            | 0.0 | 0.0 |
| <i>Acidothermus</i>       | 0.0 | 0.0  | 0.0      | 0.0            | 0.0 | 0.0 |
| <i>Acidovorax</i>         | 0.3 | 4.2  | 0.9      | 0.0            | 0.3 | 0.0 |
| <i>Acinetobacter</i>      | 1.6 | 10.2 | 0.6      | 0.4            | 0.3 | 0.4 |
| <i>Actibacter</i>         | 0.0 | 0.0  | 0.0      | 0.0            | 0.0 | 0.0 |
| <i>Actinomyces</i>        | 0.0 | 0.0  | 0.1      | 1.3            | 0.0 | 0.0 |
| <i>Actinopolyspora</i>    | 0.0 | 0.0  | 0.0      | 0.0            | 0.0 | 0.0 |
| <i>Adhaeribacter</i>      | 0.0 | 0.0  | 0.0      | 0.0            | 0.0 | 0.0 |
| <i>Aequorivita</i>        | 0.0 | 0.1  | 0.0      | 0.0            | 0.0 | 0.0 |
| <i>Aeromicrobium</i>      | 0.0 | 0.0  | 0.0      | 0.1            | 0.0 | 0.0 |
| <i>Aeromonas</i>          | 0.0 | 0.5  | 0.0      | 0.0            | 0.2 | 0.1 |
| <i>Aestuariibaculum</i>   | 0.0 | 0.0  | 0.0      | 0.0            | 0.0 | 0.0 |
| <i>Aestuariimicrobium</i> | 0.0 | 0.0  | 0.0      | 0.0            | 0.0 | 0.0 |
| <i>Ajfella</i>            | 0.0 | 0.0  | 0.0      | 0.0            | 0.0 | 0.1 |
| <i>Agaricicola</i>        | 0.0 | 0.0  | 0.0      | 0.0            | 0.0 | 0.0 |
| <i>Agromyces</i>          | 0.0 | 0.0  | 0.0      | 0.0            | 0.0 | 0.0 |
| <i>Akkermansia</i>        | 0.0 | 0.0  | 0.9      | 0.0            | 0.0 | 0.0 |
| <i>Albidiferax</i>        | 0.1 | 0.0  | 0.0      | 0.0            | 0.3 | 0.0 |
| <i>Alcaligenes</i>        | 0.0 | 0.1  | 0.0      | 0.0            | 0.0 | 0.0 |
| <i>Alicyclophilus</i>     | 0.0 | 0.2  | 0.0      | 0.1            | 0.0 | 0.0 |
| <i>Alistipes</i>          | 0.0 | 0.0  | 0.1      | 0.0            | 0.1 | 0.0 |
| <i>Alkaliphilus</i>       | 0.0 | 0.0  | 0.0      | 0.0            | 0.0 | 0.0 |
| <i>Alkanindiges</i>       | 0.0 | 0.0  | 0.0      | 0.0            | 0.0 | 0.0 |
| <i>Allobaculum</i>        | 0.0 | 0.0  | 0.0      | 0.0            | 0.0 | 0.0 |
| <i>Allochromatium</i>     | 0.0 | 0.0  | 0.0      | 9.9            | 0.0 | 0.0 |
| <i>Allofustis</i>         | 0.0 | 0.0  | 0.0      | 0.0            | 0.0 | 0.0 |
| <i>Alloprevotella</i>     | 0.0 | 0.0  | 0.1      | 0.1            | 0.0 | 0.0 |
| <i>Alpinimonas</i>        | 0.1 | 0.0  | 0.0      | 0.2            | 1.2 | 0.0 |
| <i>Alsobacter</i>         | 0.0 | 0.0  | 0.0      | 0.0            | 0.1 | 0.0 |
| <i>Alterococcus</i>       | 0.0 | 0.0  | 0.0      | 0.0            | 0.0 | 0.0 |
| <i>Alteromonas</i>        | 0.0 | 0.0  | 0.0      | 0.0            | 0.1 | 0.0 |
| <i>Aminomonas</i>         | 0.0 | 0.0  | 0.0      | 0.0            | 0.0 | 0.0 |
| <i>Anaerobacterium</i>    | 0.0 | 0.0  | 0.0      | 0.0            | 0.0 | 0.0 |
| <i>Anaerococcus</i>       | 0.0 | 0.0  | 0.0      | 0.1            | 0.0 | 0.0 |
| <i>Anaerofilum</i>        | 0.0 | 0.0  | 0.0      | 0.0            | 0.0 | 0.0 |
| <i>Anaerofustis</i>       | 0.0 | 0.0  | 0.0      | 0.0            | 0.0 | 0.0 |
| <i>Anaerolinea</i>        | 0.0 | 0.0  | 0.0      | 0.0            | 0.0 | 0.0 |
| <i>Anaeromyxobacter</i>   | 0.0 | 0.0  | 0.0      | 0.0            | 0.0 | 0.0 |
| <i>Anaerosalibacter</i>   | 0.0 | 0.0  | 0.0      | 0.0            | 0.0 | 0.0 |
| <i>Anaerostipes</i>       | 0.0 | 0.0  | 0.0      | 0.0            | 0.0 | 0.0 |
| <i>Anaerotruncus</i>      | 0.0 | 0.0  | 0.0      | 0.0            | 0.0 | 0.0 |
| <i>Anaerovibrio</i>       | 0.0 | 0.0  | 0.1      | 0.0            | 0.0 | 0.0 |
| <i>Anaerovorax</i>        | 0.0 | 0.0  | 0.0      | 0.0            | 0.0 | 0.0 |

Supplementary Figure S2, continued

| Genus                  | S1a  | Zoo | Hospital | Slaughterhouse | S1b | S1c  |
|------------------------|------|-----|----------|----------------|-----|------|
| <i>Ancalomicrobium</i> | 0.0  | 0.0 | 0.0      | 0.0            | 0.0 | 0.0  |
| <i>Ancylobacter</i>    | 0.0  | 0.0 | 0.0      | 0.0            | 0.0 | 0.0  |
| <i>Andersenella</i>    | 0.0  | 0.0 | 0.0      | 0.0            | 0.0 | 0.0  |
| <i>Aphanizomenon</i>   | 0.0  | 0.0 | 0.0      | 0.0            | 0.0 | 0.0  |
| <i>Aquabacterium</i>   | 0.0  | 0.6 | 0.0      | 0.0            | 0.4 | 0.0  |
| <i>Aquibacter</i>      | 0.0  | 0.0 | 0.0      | 0.0            | 0.0 | 0.0  |
| <i>Aquicella</i>       | 0.0  | 0.0 | 0.0      | 0.0            | 0.0 | 0.0  |
| <i>Aquitalea</i>       | 0.0  | 0.0 | 0.0      | 0.0            | 0.1 | 0.0  |
| <i>Arcicella</i>       | 0.0  | 0.0 | 0.0      | 0.0            | 0.0 | 0.0  |
| <i>Arcobacter</i>      | 0.0  | 0.0 | 0.2      | 0.0            | 0.3 | 0.3  |
| <i>Arenimonas</i>      | 0.8  | 0.0 | 0.0      | 0.0            | 0.0 | 0.0  |
| <i>Arthrobacter</i>    | 0.4  | 0.8 | 0.3      | 1.3            | 0.0 | 0.0  |
| <i>Asteroleplasma</i>  | 0.0  | 0.0 | 0.0      | 0.0            | 0.0 | 0.0  |
| <i>Asticcacaulis</i>   | 0.0  | 0.0 | 0.0      | 0.0            | 0.0 | 0.0  |
| <i>Atopobium</i>       | 0.0  | 0.0 | 0.2      | 0.1            | 0.0 | 0.0  |
| <i>Atopostipes</i>     | 0.0  | 0.2 | 0.0      | 0.0            | 0.0 | 0.0  |
| <i>Aureimarina</i>     | 0.0  | 0.0 | 0.0      | 0.0            | 0.0 | 0.0  |
| <i>Austwickia</i>      | 0.0  | 0.0 | 0.0      | 0.0            | 0.0 | 0.0  |
| <i>Azoarcus</i>        | 0.2  | 0.0 | 0.1      | 0.0            | 0.0 | 0.0  |
| <i>Azonexus</i>        | 0.0  | 0.0 | 0.0      | 0.0            | 0.5 | 0.0  |
| <i>Azospira</i>        | 0.2  | 0.0 | 0.2      | 0.0            | 0.0 | 0.0  |
| <i>Bacillus</i>        | 5.3  | 0.0 | 0.0      | 0.4            | 0.0 | 0.0  |
| <i>Bacteriovorax</i>   | 0.0  | 0.0 | 0.0      | 0.0            | 0.4 | 0.0  |
| <i>Bacteroides</i>     | 0.0  | 0.2 | 0.2      | 0.4            | 0.0 | 0.0  |
| <i>Barnesiella</i>     | 0.0  | 0.0 | 0.0      | 0.0            | 0.0 | 0.0  |
| <i>Bdellovibrio</i>    | 0.0  | 0.0 | 0.0      | 0.0            | 0.7 | 0.0  |
| <i>Beggiatoa</i>       | 0.0  | 0.0 | 0.0      | 0.0            | 0.0 | 0.0  |
| <i>Bellilinea</i>      | 0.0  | 0.0 | 0.0      | 0.0            | 0.0 | 0.0  |
| <i>Bifidobacterium</i> | 0.0  | 0.0 | 10.6     | 2.4            | 0.0 | 0.0  |
| <i>Bizonia</i>         | 0.0  | 0.0 | 0.0      | 0.0            | 0.0 | 0.0  |
| <i>Blastocatella</i>   | 0.1  | 0.0 | 0.1      | 0.0            | 0.0 | 0.0  |
| <i>Blastococcus</i>    | 0.1  | 0.0 | 0.0      | 0.0            | 0.1 | 0.0  |
| <i>Blautia</i>         | 0.0  | 0.0 | 0.1      | 0.1            | 0.0 | 0.0  |
| <i>Bordetella</i>      | 0.0  | 0.0 | 0.0      | 0.0            | 0.0 | 0.0  |
| <i>Bosea</i>           | 0.0  | 0.1 | 0.2      | 0.0            | 0.0 | 0.0  |
| <i>Brachybacterium</i> | 0.0  | 0.2 | 0.0      | 0.0            | 0.0 | 0.0  |
| <i>Brachymonas</i>     | 0.0  | 0.0 | 0.1      | 0.2            | 0.0 | 0.0  |
| <i>Brevibacillus</i>   | 11.1 | 0.0 | 0.0      | 0.0            | 0.0 | 0.0  |
| <i>Brevibacterium</i>  | 0.1  | 0.4 | 0.0      | 0.3            | 0.0 | 0.0  |
| <i>Brevundimonas</i>   | 12.3 | 1.5 | 0.0      | 0.1            | 0.0 | 0.0  |
| <i>Brooklawia</i>      | 0.0  | 0.0 | 0.1      | 0.0            | 0.0 | 0.0  |
| <i>Bryobacter</i>      | 0.1  | 0.0 | 0.0      | 0.0            | 0.0 | 0.0  |
| <i>Burkholderia</i>    | 0.0  | 0.0 | 0.0      | 0.0            | 0.0 | 0.0  |
| <i>Butyrivibrio</i>    | 0.0  | 0.0 | 0.0      | 0.0            | 0.0 | 0.0  |
| <i>Caldisericum</i>    | 0.0  | 0.0 | 0.1      | 0.0            | 0.0 | 0.0  |
| <i>Caldithrix</i>      | 0.0  | 0.0 | 0.0      | 0.0            | 0.0 | 0.3  |
| <i>Camelimonas</i>     | 0.0  | 0.0 | 0.0      | 0.0            | 0.0 | 0.0  |
| <i>Candidatus</i>      | 0.1  | 0.0 | 0.6      | 0.0            | 0.5 | 15.5 |
| <i>Catenibacterium</i> | 0.0  | 0.0 | 0.1      | 0.0            | 0.0 | 0.0  |
| <i>Caulobacter</i>     | 0.0  | 0.0 | 0.1      | 0.0            | 0.0 | 0.0  |
| <i>Cetobacterium</i>   | 0.1  | 0.0 | 0.0      | 0.0            | 0.0 | 0.0  |
| <i>Chelatococcus</i>   | 0.0  | 0.0 | 0.0      | 0.0            | 0.0 | 0.0  |
| <i>Chitinimonas</i>    | 0.0  | 0.0 | 0.0      | 0.0            | 0.0 | 0.0  |

**Supplementary Figure S2, continued**

| Genus                   | S1a | Zoo  | Hospital | Slaughterhouse | S1b | S1c |
|-------------------------|-----|------|----------|----------------|-----|-----|
| <i>Chitinivorax</i>     | 0.0 | 0.0  | 0.0      | 0.0            | 0.1 | 0.0 |
| <i>Chitinophaga</i>     | 0.0 | 0.0  | 0.0      | 0.0            | 0.0 | 0.0 |
| <i>Chloronema</i>       | 0.0 | 0.0  | 0.0      | 0.1            | 0.0 | 0.0 |
| <i>Chroococidiopsis</i> | 0.0 | 0.0  | 0.0      | 0.0            | 0.0 | 0.0 |
| <i>Chryseobacterium</i> | 0.3 | 7.2  | 0.4      | 0.0            | 0.0 | 0.0 |
| <i>Chryseolinea</i>     | 0.0 | 0.0  | 0.0      | 0.0            | 0.0 | 0.0 |
| <i>Chryseomicrobium</i> | 0.0 | 0.1  | 0.0      | 0.2            | 0.1 | 2.0 |
| <i>Chthoniobacter</i>   | 0.0 | 0.0  | 0.0      | 0.0            | 0.0 | 0.0 |
| <i>Cloacibacillus</i>   | 0.0 | 0.0  | 0.0      | 0.0            | 0.0 | 0.0 |
| <i>Cloacibacterium</i>  | 0.2 | 3.8  | 1.7      | 0.2            | 1.0 | 0.0 |
| <i>Clostridium</i>      | 0.0 | 0.0  | 0.0      | 0.1            | 0.0 | 0.0 |
| <i>Collinsella</i>      | 0.0 | 5.3  | 5.0      | 0.1            | 0.0 | 0.0 |
| <i>Colwellia</i>        | 0.0 | 0.0  | 0.0      | 0.0            | 0.0 | 0.0 |
| <i>Comamonas</i>        | 0.4 | 22.9 | 12.7     | 0.4            | 0.1 | 0.1 |
| <i>Corynebacterium</i>  | 0.1 | 0.3  | 0.0      | 2.2            | 0.0 | 0.0 |
| <i>Coxiella</i>         | 0.0 | 0.0  | 0.1      | 0.0            | 0.0 | 0.0 |
| <i>Craurococcus</i>     | 0.0 | 0.0  | 0.0      | 0.0            | 0.0 | 0.0 |
| <i>Crenothrix</i>       | 0.0 | 0.0  | 0.0      | 0.0            | 0.0 | 0.0 |
| <i>Crocinitomix</i>     | 0.0 | 0.0  | 0.0      | 0.0            | 0.0 | 0.0 |
| <i>Cupriavidus</i>      | 0.1 | 0.0  | 0.0      | 0.0            | 0.0 | 0.0 |
| <i>Curvibacter</i>      | 0.1 | 0.1  | 0.2      | 0.0            | 0.2 | 0.0 |
| <i>Dechloromonas</i>    | 0.1 | 0.0  | 0.1      | 0.0            | 0.3 | 0.0 |
| <i>Deferrisoma</i>      | 0.0 | 0.0  | 0.0      | 0.0            | 0.0 | 0.1 |
| <i>Defluviicoccus</i>   | 0.0 | 0.0  | 0.0      | 0.1            | 0.0 | 0.0 |
| <i>Defluviimonas</i>    | 0.0 | 0.2  | 0.0      | 0.0            | 0.0 | 0.0 |
| <i>Deinococcus</i>      | 0.2 | 0.1  | 0.0      | 1.0            | 0.0 | 0.0 |
| <i>Dermacoccus</i>      | 0.0 | 0.0  | 0.0      | 0.0            | 0.0 | 0.0 |
| <i>Deroxia</i>          | 0.0 | 0.0  | 0.0      | 0.0            | 0.0 | 0.0 |
| <i>Desulfatiglans</i>   | 0.0 | 0.0  | 0.0      | 0.0            | 0.0 | 0.0 |
| <i>Desulfobacca</i>     | 0.0 | 0.0  | 0.0      | 0.0            | 0.0 | 0.1 |
| <i>Desulfobulbus</i>    | 0.0 | 0.0  | 0.0      | 0.1            | 0.0 | 0.9 |
| <i>Desulfomonile</i>    | 0.0 | 0.0  | 0.0      | 0.0            | 0.0 | 0.0 |
| <i>Desulfonispota</i>   | 0.0 | 0.0  | 0.0      | 0.0            | 0.0 | 0.0 |
| <i>Desulfopila</i>      | 0.0 | 0.0  | 0.0      | 0.0            | 0.0 | 0.0 |
| <i>Desulforhabdus</i>   | 0.0 | 0.0  | 0.0      | 0.0            | 0.0 | 0.0 |
| <i>Desulfovibrio</i>    | 0.0 | 0.0  | 0.2      | 0.1            | 0.0 | 0.0 |
| <i>Desulfuromusa</i>    | 0.0 | 0.0  | 0.0      | 0.0            | 0.0 | 0.0 |
| <i>Devosia</i>          | 0.1 | 0.1  | 0.0      | 0.0            | 0.0 | 0.0 |
| <i>Dialister</i>        | 0.0 | 0.0  | 0.5      | 0.0            | 0.0 | 0.0 |
| <i>Dietzia</i>          | 0.1 | 0.5  | 0.0      | 0.1            | 0.0 | 0.0 |
| <i>Diplorickettsia</i>  | 0.0 | 0.0  | 0.0      | 0.0            | 0.0 | 0.0 |
| <i>Dokdonella</i>       | 0.0 | 0.0  | 0.0      | 0.0            | 0.0 | 0.0 |
| <i>Dolosicoccus</i>     | 0.0 | 0.5  | 0.0      | 0.0            | 0.0 | 0.0 |
| <i>Dorea</i>            | 0.0 | 0.0  | 0.0      | 0.0            | 0.0 | 0.0 |
| <i>Draconibacterium</i> | 0.0 | 0.0  | 0.0      | 0.0            | 0.0 | 0.0 |
| <i>Dysgonomonas</i>     | 0.0 | 0.0  | 0.0      | 0.0            | 0.0 | 0.0 |
| <i>Edwardsiella</i>     | 0.0 | 0.0  | 0.0      | 0.0            | 0.0 | 0.0 |
| <i>Eggerthella</i>      | 0.0 | 0.0  | 0.1      | 0.0            | 0.0 | 0.0 |
| <i>Elizabethkingia</i>  | 0.0 | 0.1  | 0.3      | 0.0            | 0.0 | 0.0 |
| <i>Elusimicrobium</i>   | 0.0 | 0.0  | 0.0      | 0.0            | 0.0 | 0.0 |
| <i>Empedobacter</i>     | 0.0 | 3.5  | 0.0      | 0.0            | 0.0 | 0.0 |
| <i>Emticicia</i>        | 0.0 | 0.0  | 0.0      | 0.0            | 0.0 | 0.0 |
| <i>Enterobacter</i>     | 0.1 | 0.3  | 2.8      | 0.4            | 0.0 | 0.0 |

**Supplementary Figure S2, continued**

| Genus                         | S1a  | Zoo | Hospital | Slaughterhouse | S1b | S1c |
|-------------------------------|------|-----|----------|----------------|-----|-----|
| <i>Enterococcus</i>           | 0.1  | 0.0 | 0.7      | 1.4            | 0.0 | 0.0 |
| <i>Enterorhabdus</i>          | 0.0  | 0.0 | 0.1      | 0.0            | 0.0 | 0.0 |
| <i>Erysipelatoclostridium</i> | 0.0  | 0.0 | 0.0      | 0.1            | 0.0 | 0.0 |
| <i>Erysipelothrix</i>         | 0.0  | 0.2 | 0.0      | 1.0            | 0.0 | 0.0 |
| <i>Erythrobacter</i>          | 0.0  | 0.0 | 0.0      | 0.0            | 0.0 | 0.4 |
| <i>Escherichia-Shigella</i>   | 0.0  | 0.3 | 0.4      | 1.3            | 0.0 | 0.0 |
| <i>Eubacterium</i>            | 0.0  | 0.0 | 0.1      | 0.1            | 0.0 | 0.0 |
| <i>Exiguobacterium</i>        | 0.0  | 0.1 | 0.0      | 0.0            | 0.0 | 1.0 |
| <i>Faecalibacterium</i>       | 0.0  | 0.0 | 0.2      | 0.0            | 0.0 | 0.0 |
| <i>Faecalicoccus</i>          | 0.0  | 0.0 | 0.0      | 0.0            | 0.0 | 0.0 |
| <i>Fastidiosipila</i>         | 0.0  | 0.0 | 0.0      | 0.9            | 0.0 | 0.0 |
| <i>Ferruginibacter</i>        | 0.1  | 0.0 | 0.0      | 0.0            | 0.0 | 0.0 |
| <i>Fibrella</i>               | 0.6  | 0.0 | 0.0      | 0.0            | 0.0 | 0.0 |
| <i>Fictibacillus</i>          | 10.7 | 0.0 | 0.0      | 0.0            | 0.0 | 0.0 |
| <i>Filomicrobium</i>          | 0.0  | 0.0 | 0.0      | 0.0            | 0.0 | 0.2 |
| <i>Flavisolibacter</i>        | 0.0  | 0.0 | 0.0      | 0.0            | 0.0 | 0.0 |
| <i>Flavitalea</i>             | 0.0  | 0.0 | 0.0      | 0.0            | 0.0 | 0.0 |
| <i>Flavobacterium</i>         | 0.2  | 9.9 | 0.1      | 0.0            | 1.2 | 0.0 |
| <i>Flavonifractor</i>         | 0.0  | 0.0 | 0.0      | 0.0            | 0.0 | 0.0 |
| <i>Flectobacillus</i>         | 0.0  | 0.0 | 0.0      | 0.0            | 0.5 | 0.0 |
| <i>Fluviicola</i>             | 0.0  | 0.0 | 0.0      | 0.0            | 0.1 | 0.0 |
| <i>Fodinicola</i>             | 0.1  | 0.0 | 0.0      | 0.0            | 0.0 | 0.0 |
| <i>Formivibrio</i>            | 0.0  | 0.0 | 0.0      | 0.0            | 0.0 | 0.0 |
| <i>Fusibacter</i>             | 0.0  | 0.0 | 0.0      | 0.0            | 0.0 | 0.0 |
| <i>Fusicatenibacter</i>       | 0.0  | 0.0 | 0.0      | 0.0            | 0.0 | 0.0 |
| <i>Fusobacterium</i>          | 0.0  | 0.1 | 0.0      | 0.0            | 0.0 | 0.0 |
| <i>Gaiella</i>                | 0.1  | 0.0 | 0.0      | 0.1            | 0.0 | 0.0 |
| <i>Gallicola</i>              | 0.0  | 0.0 | 0.1      | 0.3            | 0.0 | 0.0 |
| <i>Gardnerella</i>            | 0.0  | 0.0 | 0.0      | 0.0            | 0.0 | 0.0 |
| <i>Gelria</i>                 | 0.0  | 0.0 | 0.0      | 0.0            | 0.0 | 0.0 |
| <i>Gemmatimonas</i>           | 0.0  | 0.0 | 0.0      | 0.0            | 0.0 | 0.0 |
| <i>Gemmobacter</i>            | 0.0  | 0.2 | 0.0      | 0.0            | 0.0 | 0.0 |
| <i>Geoalkalibacter</i>        | 0.0  | 0.0 | 0.0      | 0.0            | 0.0 | 0.0 |
| <i>Geobacter</i>              | 0.0  | 0.0 | 0.0      | 0.0            | 0.0 | 0.0 |
| <i>Geodermatophilus</i>       | 0.0  | 0.0 | 0.0      | 0.0            | 0.0 | 0.0 |
| <i>Geothrix</i>               | 0.0  | 0.0 | 0.0      | 0.0            | 0.1 | 0.0 |
| <i>Globicatella</i>           | 0.0  | 0.0 | 0.0      | 0.2            | 0.0 | 0.0 |
| <i>Gordonia</i>               | 0.0  | 0.1 | 0.0      | 0.1            | 0.0 | 0.0 |
| <i>Gottschalkia</i>           | 0.0  | 0.0 | 0.0      | 0.0            | 0.0 | 0.0 |
| <i>Gracilibacter</i>          | 0.0  | 0.0 | 0.0      | 0.0            | 0.0 | 0.0 |
| <i>Granulosicoccus</i>        | 0.0  | 0.0 | 0.0      | 0.0            | 0.0 | 0.0 |
| <i>Guggenheimella</i>         | 0.0  | 0.0 | 0.0      | 0.3            | 0.0 | 0.0 |
| <i>Haemophilus</i>            | 0.0  | 0.0 | 0.0      | 0.0            | 0.0 | 0.0 |
| <i>Hahella</i>                | 0.0  | 0.0 | 0.0      | 0.0            | 0.0 | 0.0 |
| <i>Haliangium</i>             | 0.0  | 0.0 | 0.1      | 0.0            | 0.1 | 0.0 |
| <i>Haliea</i>                 | 0.0  | 0.0 | 0.0      | 0.0            | 0.0 | 0.1 |
| <i>Haloferula</i>             | 0.0  | 0.0 | 0.0      | 0.0            | 0.0 | 0.0 |
| <i>Halomonas</i>              | 0.0  | 0.0 | 0.0      | 0.0            | 0.0 | 0.0 |
| <i>Helcobacillus</i>          | 0.0  | 0.2 | 0.0      | 0.0            | 0.0 | 0.0 |
| <i>Helcococcus</i>            | 0.0  | 0.0 | 0.0      | 0.1            | 0.0 | 0.0 |
| <i>Hirschia</i>               | 0.1  | 0.0 | 0.0      | 0.0            | 0.0 | 0.0 |
| <i>Holdemanella</i>           | 0.0  | 0.0 | 1.4      | 0.0            | 0.0 | 0.0 |
| <i>Hungatella</i>             | 0.0  | 0.0 | 0.0      | 0.0            | 0.0 | 0.0 |



**Supplementary Figure S2, continued**

| Genus                     | S1a | Zoo | Hospital | Slaughterhouse | S1b | S1c |
|---------------------------|-----|-----|----------|----------------|-----|-----|
| <i>Hydrogenophaga</i>     | 0.2 | 0.2 | 0.1      | 0.1            | 0.5 | 0.0 |
| <i>Hydrotalea</i>         | 0.0 | 0.0 | 0.0      | 0.0            | 0.0 | 0.0 |
| <i>Hymenobacter</i>       | 0.0 | 0.0 | 0.0      | 0.0            | 0.0 | 0.0 |
| <i>Hyphomicrobium</i>     | 0.1 | 0.0 | 0.0      | 0.0            | 0.0 | 0.0 |
| <i>Iamia</i>              | 0.0 | 0.0 | 0.0      | 0.0            | 0.0 | 0.0 |
| <i>Ideonella</i>          | 0.0 | 0.0 | 0.1      | 0.0            | 0.8 | 0.0 |
| <i>Ignatzschineria</i>    | 0.0 | 0.0 | 0.0      | 0.1            | 0.0 | 0.0 |
| <i>Ignavibacterium</i>    | 0.0 | 0.0 | 0.0      | 0.0            | 0.0 | 0.1 |
| <i>Ignavigranum</i>       | 0.0 | 0.0 | 0.0      | 0.0            | 0.0 | 0.0 |
| <i>Illumatobacter</i>     | 0.0 | 0.0 | 0.0      | 0.0            | 0.0 | 1.1 |
| <i>Insolitispirillum</i>  | 0.0 | 0.0 | 0.0      | 0.0            | 0.0 | 0.0 |
| <i>Intestinibacter</i>    | 0.0 | 0.0 | 0.0      | 0.0            | 0.0 | 0.0 |
| <i>Intestinimonas</i>     | 0.0 | 0.0 | 0.0      | 0.0            | 0.0 | 0.0 |
| <i>Jeotgalicoccus</i>     | 0.0 | 0.1 | 0.0      | 0.0            | 0.0 | 0.0 |
| <i>Kaistia</i>            | 0.0 | 0.0 | 0.0      | 0.0            | 0.0 | 0.0 |
| <i>Ketogulonicigenium</i> | 0.0 | 0.0 | 0.0      | 0.0            | 0.0 | 0.3 |
| <i>Kineococcus</i>        | 0.0 | 0.0 | 0.0      | 0.0            | 0.0 | 0.0 |
| <i>Kocuria</i>            | 0.0 | 0.1 | 0.0      | 0.5            | 0.0 | 0.0 |
| <i>Koukoulia</i>          | 0.0 | 0.0 | 0.0      | 0.0            | 0.0 | 0.0 |
| <i>Kurthia</i>            | 0.0 | 0.1 | 0.0      | 0.7            | 0.0 | 0.0 |
| <i>Labrys</i>             | 0.0 | 0.0 | 0.1      | 0.0            | 0.0 | 0.0 |
| <i>Lachnoclostridium</i>  | 0.0 | 0.1 | 0.2      | 0.9            | 0.0 | 0.0 |
| <i>Lachnospira</i>        | 0.0 | 0.0 | 0.0      | 0.0            | 0.0 | 0.0 |
| <i>Lacibacter</i>         | 0.0 | 0.0 | 0.0      | 0.0            | 0.0 | 0.0 |
| <i>Lactivibrio</i>        | 0.0 | 0.0 | 0.0      | 0.0            | 0.0 | 0.0 |
| <i>Lactobacillus</i>      | 0.0 | 0.0 | 0.6      | 1.5            | 0.1 | 0.0 |
| <i>Lactococcus</i>        | 0.0 | 0.0 | 0.1      | 0.5            | 0.0 | 0.0 |
| <i>Leadbetterella</i>     | 0.0 | 0.0 | 0.0      | 0.0            | 0.0 | 0.0 |
| <i>Leeia</i>              | 0.1 | 0.0 | 6.7      | 0.0            | 0.0 | 0.0 |
| <i>Legionella</i>         | 0.0 | 0.0 | 0.0      | 0.0            | 0.0 | 0.0 |
| <i>Leptolinea</i>         | 0.0 | 0.0 | 0.0      | 0.0            | 0.0 | 0.0 |
| <i>Leptolyngbya</i>       | 0.0 | 0.0 | 0.0      | 0.0            | 0.0 | 0.0 |
| <i>Leucobacter</i>        | 0.2 | 0.9 | 0.0      | 3.1            | 0.0 | 0.0 |
| <i>Leuconostoc</i>        | 0.0 | 0.0 | 0.0      | 0.0            | 0.0 | 0.0 |
| <i>Lewinella</i>          | 0.0 | 0.0 | 0.0      | 0.0            | 0.0 | 0.1 |
| <i>Limnohabitans</i>      | 0.8 | 0.0 | 0.0      | 0.0            | 3.5 | 0.0 |
| <i>Limnothrix</i>         | 0.0 | 0.0 | 0.0      | 0.0            | 0.0 | 0.0 |
| <i>Longilinea</i>         | 0.0 | 0.0 | 0.0      | 0.0            | 0.0 | 0.0 |
| <i>Luteimonas</i>         | 0.0 | 0.0 | 0.0      | 0.0            | 0.0 | 0.0 |
| <i>Luteolibacter</i>      | 0.0 | 0.0 | 0.0      | 0.0            | 0.0 | 0.0 |
| <i>Lutibacter</i>         | 0.0 | 0.0 | 0.0      | 0.0            | 0.0 | 0.0 |
| <i>Lutispora</i>          | 0.0 | 0.0 | 0.0      | 0.0            | 0.0 | 0.0 |
| <i>Lysinibacillus</i>     | 0.0 | 0.1 | 0.0      | 2.0            | 0.0 | 0.0 |
| <i>Lysobacter</i>         | 0.1 | 0.1 | 0.0      | 0.0            | 0.0 | 0.0 |
| <i>Macellibacteroides</i> | 0.0 | 0.0 | 0.0      | 0.0            | 0.0 | 0.0 |
| <i>Macrococcus</i>        | 0.0 | 0.1 | 0.0      | 0.4            | 0.0 | 0.0 |
| <i>Magnetospirillum</i>   | 0.0 | 0.0 | 0.0      | 0.0            | 0.0 | 0.0 |
| <i>Mangrovibacterium</i>  | 0.0 | 0.0 | 0.0      | 0.0            | 0.0 | 0.0 |
| <i>Marinicella</i>        | 0.0 | 0.0 | 0.0      | 0.0            | 0.0 | 1.1 |
| <i>Marinobacterium</i>    | 0.0 | 0.0 | 0.0      | 0.0            | 0.0 | 0.0 |
| <i>Marinomonas</i>        | 0.0 | 0.0 | 0.0      | 0.0            | 0.1 | 0.4 |
| <i>Maritimimonas</i>      | 0.0 | 0.0 | 0.0      | 0.0            | 0.0 | 0.0 |
| <i>Massilia</i>           | 5.7 | 0.1 | 0.0      | 0.0            | 0.0 | 0.0 |

Supplementary Figure S2, continued

| Genus                     | S1a | Zoo | Hospital | Slaughterhouse | S1b | S1c |
|---------------------------|-----|-----|----------|----------------|-----|-----|
| <i>Megamonas</i>          | 0.0 | 0.2 | 0.5      | 0.0            | 0.0 | 0.0 |
| <i>Meganema</i>           | 0.0 | 0.0 | 0.1      | 0.0            | 0.1 | 0.0 |
| <i>Megasphaera</i>        | 0.0 | 0.0 | 0.6      | 0.2            | 0.0 | 0.0 |
| <i>Meniscus</i>           | 0.0 | 0.0 | 0.0      | 0.0            | 0.0 | 0.0 |
| <i>Methylobacterium</i>   | 0.1 | 0.0 | 0.1      | 0.1            | 0.0 | 0.0 |
| <i>Methylocaldum</i>      | 0.0 | 0.0 | 0.0      | 0.0            | 0.0 | 0.0 |
| <i>Methyloceanibacter</i> | 0.0 | 0.0 | 0.0      | 0.0            | 0.0 | 0.5 |
| <i>Methylomonas</i>       | 0.0 | 0.0 | 0.0      | 0.0            | 0.0 | 0.0 |
| <i>Methylophilus</i>      | 0.0 | 0.0 | 0.0      | 0.0            | 0.1 | 0.0 |
| <i>Methylosinus</i>       | 0.0 | 0.0 | 0.2      | 0.0            | 0.0 | 0.0 |
| <i>Methyлотenera</i>      | 0.7 | 0.0 | 0.0      | 0.0            | 0.0 | 0.0 |
| <i>Methyloversatilis</i>  | 0.0 | 0.0 | 0.0      | 0.0            | 0.0 | 0.0 |
| <i>Methylovulum</i>       | 0.0 | 0.0 | 0.0      | 0.0            | 0.0 | 0.0 |
| <i>Microbacter</i>        | 0.0 | 0.0 | 0.0      | 0.0            | 0.0 | 0.0 |
| <i>Microbacterium</i>     | 0.2 | 0.1 | 0.2      | 0.1            | 0.0 | 0.0 |
| <i>Microlunatus</i>       | 0.0 | 0.0 | 0.0      | 0.0            | 0.0 | 0.0 |
| <i>Micromonospora</i>     | 0.0 | 0.0 | 0.0      | 0.1            | 0.0 | 0.0 |
| <i>Microvirga</i>         | 0.1 | 0.0 | 0.1      | 0.1            | 0.1 | 0.0 |
| <i>Mitsuokella</i>        | 0.0 | 0.0 | 0.0      | 0.0            | 0.0 | 0.0 |
| <i>Mobilicoccus</i>       | 0.0 | 0.0 | 0.0      | 0.2            | 0.0 | 0.0 |
| <i>Mobilitalea</i>        | 0.1 | 0.0 | 0.1      | 0.0            | 0.0 | 0.0 |
| <i>Mogibacterium</i>      | 0.0 | 0.0 | 0.0      | 0.0            | 0.0 | 0.0 |
| <i>Moraxella</i>          | 0.1 | 0.1 | 0.1      | 0.2            | 0.0 | 0.0 |
| <i>Morganella</i>         | 0.0 | 0.0 | 0.0      | 0.0            | 0.0 | 0.0 |
| <i>Mucispirillum</i>      | 0.0 | 0.0 | 0.0      | 0.0            | 0.0 | 0.0 |
| <i>Mycobacterium</i>      | 0.0 | 0.0 | 0.0      | 0.1            | 0.1 | 0.0 |
| <i>Myroides</i>           | 0.0 | 0.3 | 0.0      | 0.0            | 0.0 | 0.0 |
| <i>Nakamurella</i>        | 0.0 | 0.0 | 0.0      | 0.0            | 0.0 | 0.0 |
| <i>Neochlamydia</i>       | 0.0 | 0.0 | 0.0      | 0.0            | 0.0 | 0.0 |
| <i>Neptunomonas</i>       | 0.0 | 0.0 | 0.0      | 0.0            | 0.1 | 0.9 |
| <i>Nesterenkonia</i>      | 0.0 | 0.0 | 0.0      | 0.0            | 0.0 | 0.0 |
| <i>Niabella</i>           | 0.0 | 0.0 | 0.0      | 0.0            | 0.0 | 0.0 |
| <i>Niastella</i>          | 0.0 | 0.0 | 0.0      | 0.0            | 0.0 | 0.0 |
| <i>Nitrolancea</i>        | 0.0 | 0.0 | 0.0      | 0.0            | 0.0 | 0.0 |
| <i>Nitrosococcus</i>      | 0.0 | 0.0 | 0.0      | 0.0            | 0.0 | 0.0 |
| <i>Nitrosospira</i>       | 0.0 | 0.0 | 0.0      | 0.0            | 0.1 | 0.0 |
| <i>Nitrospira</i>         | 0.1 | 0.0 | 0.2      | 0.0            | 0.1 | 0.1 |
| <i>Nocardia</i>           | 0.0 | 0.0 | 0.0      | 0.0            | 0.0 | 0.0 |
| <i>Nocardioides</i>       | 0.0 | 0.0 | 0.0      | 0.0            | 0.0 | 0.0 |
| <i>Nonomuraea</i>         | 0.0 | 0.0 | 0.0      | 0.0            | 0.0 | 0.0 |
| <i>Nordella</i>           | 0.0 | 0.0 | 0.0      | 0.0            | 0.0 | 0.0 |
| <i>Nosocomiicoccus</i>    | 0.0 | 0.0 | 0.0      | 1.0            | 0.0 | 0.0 |
| <i>Novosphingobium</i>    | 0.8 | 0.3 | 0.1      | 0.0            | 0.7 | 0.2 |
| <i>Nubsella</i>           | 0.0 | 0.0 | 0.0      | 0.0            | 0.0 | 0.0 |
| <i>Oceanisphaera</i>      | 0.0 | 0.0 | 0.0      | 0.0            | 0.0 | 0.1 |
| <i>Oceanospirillum</i>    | 0.0 | 0.0 | 0.0      | 0.0            | 0.0 | 0.0 |
| <i>Ochrobactrum</i>       | 0.0 | 0.0 | 0.2      | 0.0            | 0.0 | 0.0 |
| <i>Ohtaekwangia</i>       | 0.0 | 0.0 | 0.0      | 0.0            | 0.0 | 0.0 |
| <i>Oleiphilus</i>         | 0.0 | 0.0 | 0.0      | 0.0            | 0.0 | 0.0 |
| <i>Oligella</i>           | 0.0 | 0.3 | 0.0      | 0.1            | 0.0 | 0.0 |
| <i>Olsenella</i>          | 0.0 | 0.0 | 0.4      | 0.1            | 0.0 | 0.0 |
| <i>Ornithinimicrobium</i> | 0.0 | 0.0 | 0.0      | 0.0            | 0.0 | 0.0 |
| <i>Oscillibacter</i>      | 0.0 | 0.0 | 0.0      | 0.0            | 0.0 | 0.0 |

**Supplementary Figure S2, continued**

| Genus                        | S1a | Zoo | Hospital | Slaughterhouse | S1b  | S1c |
|------------------------------|-----|-----|----------|----------------|------|-----|
| <i>Oscillospira</i>          | 0.0 | 0.0 | 0.0      | 0.0            | 0.0  | 0.0 |
| <i>Owenweeksia</i>           | 0.0 | 0.0 | 0.0      | 0.0            | 0.0  | 0.2 |
| <i>Oxalophagus</i>           | 0.0 | 0.0 | 0.0      | 0.0            | 0.0  | 0.0 |
| <i>Paenalcaligenes</i>       | 0.0 | 0.2 | 0.0      | 0.0            | 0.0  | 0.0 |
| <i>Paenibacillus</i>         | 0.7 | 0.0 | 0.0      | 0.0            | 0.0  | 0.0 |
| <i>Paenochrobactrum</i>      | 0.0 | 0.0 | 0.0      | 0.1            | 0.0  | 0.0 |
| <i>Paludibacter</i>          | 0.0 | 0.0 | 0.0      | 0.0            | 0.0  | 0.0 |
| <i>Paludibacterium</i>       | 0.0 | 0.0 | 0.0      | 0.0            | 0.1  | 0.0 |
| <i>Pandoraea</i>             | 0.0 | 0.0 | 0.0      | 0.0            | 0.0  | 0.0 |
| <i>Parabacteroides</i>       | 0.0 | 0.0 | 0.0      | 0.1            | 0.0  | 0.0 |
| <i>Paracoccus</i>            | 0.0 | 0.3 | 0.1      | 1.0            | 0.0  | 0.0 |
| <i>Paraeggerthella</i>       | 0.0 | 0.0 | 0.0      | 0.8            | 0.0  | 0.0 |
| <i>Parafilimonas</i>         | 0.0 | 0.0 | 0.0      | 0.0            | 0.0  | 0.0 |
| <i>Parapedobacter</i>        | 0.0 | 0.0 | 0.0      | 0.0            | 0.0  | 0.0 |
| <i>Paraprevotella</i>        | 0.0 | 0.0 | 0.0      | 0.0            | 0.0  | 0.0 |
| <i>Parapusillimonas</i>      | 0.0 | 0.0 | 0.0      | 0.0            | 0.0  | 0.0 |
| <i>Parvimonas</i>            | 0.0 | 0.0 | 0.0      | 0.1            | 0.0  | 0.0 |
| <i>Patulibacter</i>          | 0.0 | 0.0 | 0.0      | 0.0            | 0.0  | 0.0 |
| <i>Paucimonas</i>            | 0.0 | 0.0 | 0.1      | 0.0            | 0.1  | 0.0 |
| <i>Pectinatus</i>            | 0.0 | 0.0 | 0.0      | 0.0            | 0.0  | 0.0 |
| <i>Pediococcus</i>           | 0.0 | 0.0 | 0.0      | 0.0            | 0.0  | 0.0 |
| <i>Pedobacter</i>            | 0.0 | 0.1 | 0.0      | 0.0            | 0.0  | 0.0 |
| <i>Pedomicrobium</i>         | 0.0 | 0.0 | 0.0      | 0.0            | 0.0  | 0.0 |
| <i>Pelolinea</i>             | 0.0 | 0.0 | 0.0      | 0.0            | 0.0  | 0.0 |
| <i>Peptoclostridium</i>      | 0.0 | 0.3 | 0.0      | 0.2            | 0.0  | 0.0 |
| <i>Peptococcus</i>           | 0.0 | 0.0 | 0.0      | 0.5            | 0.0  | 0.0 |
| <i>Peptoniphilus</i>         | 0.0 | 0.0 | 0.0      | 1.3            | 0.0  | 0.0 |
| <i>Peptostreptococcus</i>    | 0.0 | 0.0 | 0.0      | 0.2            | 0.0  | 0.0 |
| <i>Peredibacter</i>          | 0.0 | 0.0 | 0.0      | 0.0            | 0.1  | 0.0 |
| <i>Persicirhabdus</i>        | 0.0 | 0.0 | 0.0      | 0.0            | 0.0  | 0.4 |
| <i>Petrimonas</i>            | 0.0 | 0.0 | 0.0      | 0.1            | 0.0  | 0.0 |
| <i>Phaeodactylibacter</i>    | 0.0 | 0.0 | 0.0      | 0.0            | 0.0  | 0.1 |
| <i>Phascolarctobacterium</i> | 0.0 | 0.0 | 0.0      | 0.0            | 0.0  | 0.0 |
| <i>Phenylobacterium</i>      | 0.1 | 0.0 | 0.0      | 0.0            | 0.0  | 0.0 |
| <i>Photobacterium</i>        | 0.0 | 0.0 | 0.0      | 0.0            | 0.0  | 0.0 |
| <i>Phreatobacter</i>         | 0.1 | 0.0 | 0.1      | 0.0            | 0.0  | 0.0 |
| <i>Planifilum</i>            | 0.0 | 0.0 | 0.0      | 0.0            | 0.0  | 0.0 |
| <i>Planktothrix</i>          | 0.0 | 0.0 | 0.0      | 0.0            | 0.0  | 0.0 |
| <i>Planococcus</i>           | 0.0 | 0.0 | 0.0      | 0.0            | 0.0  | 0.0 |
| <i>Pleomorphomonas</i>       | 0.0 | 0.0 | 0.4      | 0.0            | 0.0  | 0.0 |
| <i>Plesiomonas</i>           | 0.0 | 0.0 | 0.0      | 0.0            | 0.0  | 0.0 |
| <i>Polyangium</i>            | 0.0 | 0.0 | 0.0      | 0.0            | 0.0  | 0.0 |
| <i>Polycyclovorans</i>       | 0.0 | 0.0 | 0.0      | 0.0            | 0.0  | 0.0 |
| <i>Polynucleobacter</i>      | 0.2 | 0.0 | 0.0      | 0.0            | 11.9 | 0.0 |
| <i>Pontibacter</i>           | 0.0 | 0.0 | 0.1      | 0.0            | 0.0  | 0.3 |
| <i>Porphyromonas</i>         | 0.0 | 0.0 | 0.0      | 0.1            | 0.0  | 0.0 |
| <i>Portibacter</i>           | 0.0 | 0.0 | 0.0      | 0.0            | 0.0  | 0.0 |
| <i>Prevotella</i>            | 0.0 | 0.0 | 0.0      | 0.0            | 0.1  | 0.0 |
| <i>Prolixibacter</i>         | 0.0 | 0.0 | 0.0      | 0.0            | 0.0  | 0.0 |
| <i>Propionibacterium</i>     | 0.0 | 0.0 | 0.0      | 0.0            | 0.0  | 0.0 |
| <i>Propioniciclava</i>       | 0.0 | 0.0 | 0.6      | 0.3            | 0.0  | 0.0 |
| <i>Propionispira</i>         | 0.0 | 0.0 | 0.1      | 0.0            | 0.0  | 0.0 |
| <i>Propionivibrio</i>        | 0.0 | 0.0 | 0.7      | 0.0            | 0.0  | 0.0 |

**Supplementary Figure S2, continued**

| Genus                     | S1a | Zoo | Hospital | Slaughterhouse | S1b | S1c |
|---------------------------|-----|-----|----------|----------------|-----|-----|
| <i>Proteiniclasticum</i>  | 0.0 | 0.0 | 0.1      | 1.7            | 0.0 | 0.0 |
| <i>Proteiniphilum</i>     | 0.0 | 0.1 | 0.0      | 0.0            | 0.0 | 0.0 |
| <i>Proteocatella</i>      | 0.0 | 0.0 | 0.0      | 0.1            | 0.0 | 0.0 |
| <i>Proteus</i>            | 0.0 | 0.0 | 0.0      | 0.0            | 0.0 | 0.0 |
| <i>Providencia</i>        | 0.0 | 0.0 | 0.0      | 0.0            | 0.0 | 0.0 |
| <i>Pseudahrensia</i>      | 0.0 | 0.0 | 0.0      | 0.0            | 0.0 | 0.0 |
| <i>Pseudarcicella</i>     | 0.0 | 0.0 | 0.0      | 0.0            | 0.4 | 0.0 |
| <i>Pseudoalteromonas</i>  | 0.0 | 0.0 | 0.0      | 0.0            | 0.1 | 0.2 |
| <i>Pseudobutyrvibrio</i>  | 0.0 | 0.0 | 0.0      | 0.0            | 0.0 | 0.0 |
| <i>Pseudochrobactrum</i>  | 0.0 | 0.2 | 0.1      | 0.1            | 0.0 | 0.0 |
| <i>Pseudomonas</i>        | 1.6 | 1.3 | 0.5      | 0.0            | 0.3 | 0.9 |
| <i>Pseudonocardia</i>     | 0.0 | 0.0 | 0.0      | 0.0            | 0.0 | 0.0 |
| <i>Pseudoruegeria</i>     | 0.0 | 0.0 | 0.0      | 0.0            | 0.0 | 0.0 |
| <i>Pseudospirillum</i>    | 0.0 | 0.0 | 0.0      | 0.0            | 0.0 | 0.0 |
| <i>Pseudoxanthomonas</i>  | 0.0 | 0.0 | 0.0      | 0.0            | 0.0 | 0.0 |
| <i>Psychrobacter</i>      | 0.0 | 0.4 | 0.0      | 0.0            | 0.0 | 0.0 |
| <i>Ralstonia</i>          | 0.0 | 0.0 | 0.1      | 0.0            | 0.0 | 0.0 |
| <i>Ramlibacter</i>        | 0.1 | 0.1 | 0.0      | 0.0            | 0.1 | 0.0 |
| <i>Reichenbachiella</i>   | 0.0 | 0.0 | 0.0      | 0.0            | 0.0 | 0.0 |
| <i>Reyranella</i>         | 0.0 | 0.0 | 0.1      | 0.0            | 0.0 | 0.0 |
| <i>Rheinheimera</i>       | 0.0 | 0.0 | 0.0      | 0.0            | 0.0 | 0.1 |
| <i>Rhizobacter</i>        | 0.0 | 0.0 | 0.0      | 0.0            | 0.0 | 0.0 |
| <i>Rhizobium</i>          | 0.8 | 0.1 | 0.1      | 0.0            | 0.0 | 0.0 |
| <i>Rhizomicrobium</i>     | 0.0 | 0.0 | 0.0      | 0.0            | 0.0 | 0.0 |
| <i>Rhodobacter</i>        | 0.5 | 0.2 | 0.1      | 0.4            | 0.3 | 0.1 |
| <i>Rhodobium</i>          | 0.0 | 0.0 | 0.0      | 0.0            | 0.0 | 0.0 |
| <i>Rhodoblastus</i>       | 0.0 | 0.0 | 0.3      | 0.0            | 0.0 | 0.0 |
| <i>Rhodococcus</i>        | 0.9 | 0.0 | 0.1      | 0.2            | 0.4 | 0.1 |
| <i>Rhodoplanes</i>        | 0.1 | 0.0 | 0.1      | 0.0            | 0.0 | 0.0 |
| <i>Rhodopseudomonas</i>   | 0.0 | 0.0 | 0.1      | 0.5            | 0.0 | 0.0 |
| <i>Rhodovarius</i>        | 0.0 | 0.0 | 0.0      | 0.0            | 0.0 | 0.0 |
| <i>Rickettsiella</i>      | 0.1 | 0.0 | 0.0      | 0.0            | 0.0 | 0.0 |
| <i>Rivicola</i>           | 0.0 | 0.0 | 0.0      | 0.0            | 0.0 | 0.0 |
| <i>Robiginitalea</i>      | 0.0 | 0.0 | 0.0      | 0.0            | 0.0 | 0.3 |
| <i>Romboutsia</i>         | 0.0 | 0.0 | 1.2      | 0.0            | 0.0 | 0.0 |
| <i>Roseburia</i>          | 0.0 | 0.0 | 0.0      | 0.0            | 0.0 | 0.0 |
| <i>Roseibacillus</i>      | 0.0 | 0.0 | 0.0      | 0.0            | 0.0 | 0.1 |
| <i>Roseiflexus</i>        | 0.1 | 0.0 | 0.2      | 0.0            | 0.0 | 0.0 |
| <i>Roseomonas</i>         | 0.0 | 0.0 | 0.0      | 0.0            | 0.0 | 0.0 |
| <i>Rubellimicrobium</i>   | 0.0 | 0.0 | 0.0      | 0.2            | 0.0 | 0.0 |
| <i>Rubidimonas</i>        | 0.0 | 0.0 | 0.0      | 0.0            | 0.0 | 0.0 |
| <i>Rubroacter</i>         | 0.1 | 0.0 | 0.0      | 0.0            | 0.0 | 0.0 |
| <i>Rudanella</i>          | 0.0 | 0.0 | 0.0      | 0.0            | 0.0 | 0.0 |
| <i>Ruminococcus</i>       | 0.0 | 0.0 | 0.0      | 0.0            | 0.0 | 0.0 |
| <i>Saccharofermentans</i> | 0.0 | 0.0 | 0.0      | 0.0            | 0.0 | 0.0 |
| <i>Saccharomonospora</i>  | 0.0 | 0.0 | 0.0      | 0.0            | 0.0 | 0.0 |
| <i>Salinihabitans</i>     | 0.0 | 0.0 | 0.0      | 0.0            | 0.0 | 0.5 |
| <i>Salinirepens</i>       | 0.0 | 0.0 | 0.0      | 0.0            | 0.0 | 0.0 |
| <i>Sandaracinobacter</i>  | 0.0 | 0.0 | 0.0      | 0.0            | 0.0 | 0.0 |
| <i>Sandaracinus</i>       | 0.0 | 0.0 | 0.0      | 0.0            | 0.0 | 0.0 |
| <i>Sarcina</i>            | 0.0 | 0.0 | 0.0      | 0.0            | 0.0 | 0.0 |
| <i>Sedimentibacter</i>    | 0.0 | 0.0 | 0.2      | 0.1            | 0.0 | 0.0 |
| <i>Sedimenticola</i>      | 0.0 | 0.0 | 0.0      | 0.0            | 0.0 | 0.1 |

**Supplementary Figure S2, continued**

| Genus                      | S1a  | Zoo | Hospital | Slaughterhouse | S1b | S1c |
|----------------------------|------|-----|----------|----------------|-----|-----|
| <i>Sediminibacterium</i>   | 0.1  | 0.0 | 0.0      | 0.0            | 1.7 | 0.0 |
| <i>Selenomonas</i>         | 0.0  | 0.0 | 0.1      | 0.0            | 0.0 | 0.0 |
| <i>Senegalimassilia</i>    | 0.0  | 0.0 | 0.3      | 0.0            | 0.0 | 0.0 |
| <i>Sharpea</i>             | 0.0  | 0.0 | 0.0      | 0.1            | 0.0 | 0.0 |
| <i>Shewanella</i>          | 0.0  | 0.0 | 0.0      | 0.0            | 0.0 | 0.0 |
| <i>Shuttleworthia</i>      | 0.0  | 0.0 | 0.0      | 0.0            | 0.0 | 0.0 |
| <i>Sinibacillus</i>        | 0.0  | 0.0 | 0.0      | 0.0            | 0.0 | 0.0 |
| <i>Skermanella</i>         | 0.0  | 0.0 | 0.1      | 0.0            | 0.0 | 0.0 |
| <i>Slackia</i>             | 0.0  | 0.1 | 0.1      | 0.0            | 0.0 | 0.0 |
| <i>Smithella</i>           | 0.0  | 0.0 | 0.0      | 0.1            | 0.0 | 0.0 |
| <i>Solibacillus</i>        | 0.0  | 0.1 | 0.0      | 0.0            | 0.0 | 0.0 |
| <i>Solirubrobacter</i>     | 0.0  | 0.0 | 0.0      | 0.0            | 0.0 | 0.0 |
| <i>Solobacterium</i>       | 0.0  | 3.5 | 0.2      | 0.1            | 0.0 | 0.0 |
| <i>Soonwooa</i>            | 0.2  | 2.4 | 0.0      | 0.1            | 0.0 | 0.0 |
| <i>Sorangium</i>           | 0.0  | 0.0 | 0.0      | 0.0            | 0.1 | 0.0 |
| <i>Sphaerochaeta</i>       | 0.0  | 0.0 | 0.0      | 0.1            | 0.0 | 0.0 |
| <i>Sphaerotilus</i>        | 0.0  | 0.0 | 0.0      | 0.0            | 0.0 | 0.0 |
| <i>Sphingobacterium</i>    | 0.0  | 0.7 | 0.0      | 0.0            | 0.0 | 0.0 |
| <i>Sphingobium</i>         | 19.4 | 0.0 | 0.0      | 0.0            | 0.0 | 0.0 |
| <i>Sphingomonas</i>        | 0.6  | 0.0 | 0.3      | 0.1            | 0.1 | 0.0 |
| <i>Sphingopyxis</i>        | 0.0  | 0.1 | 0.0      | 0.0            | 0.0 | 0.0 |
| <i>Spirillum</i>           | 0.0  | 0.0 | 0.0      | 0.0            | 0.0 | 0.0 |
| <i>Spirochaeta</i>         | 0.0  | 0.0 | 0.0      | 0.0            | 0.0 | 0.0 |
| <i>Sporichthya</i>         | 0.0  | 0.0 | 0.0      | 0.0            | 0.0 | 0.0 |
| <i>Sporomusa</i>           | 0.0  | 0.0 | 0.0      | 0.0            | 0.0 | 0.0 |
| <i>Sporosarcina</i>        | 0.0  | 0.0 | 0.0      | 0.2            | 0.0 | 0.0 |
| <i>Staphylococcus</i>      | 0.0  | 0.0 | 0.0      | 0.0            | 0.0 | 0.0 |
| <i>Stenotrophomonas</i>    | 0.0  | 0.7 | 0.1      | 0.0            | 0.0 | 0.2 |
| <i>Stenoxybacter</i>       | 0.0  | 0.0 | 0.0      | 0.0            | 0.0 | 0.0 |
| <i>Steroidobacter</i>      | 0.1  | 0.0 | 0.0      | 0.0            | 0.0 | 0.0 |
| <i>Streptococcus</i>       | 0.0  | 0.0 | 4.4      | 9.7            | 0.0 | 0.0 |
| <i>Streptomyces</i>        | 0.1  | 0.0 | 0.1      | 0.0            | 0.0 | 0.0 |
| <i>Subdoligranulum</i>     | 0.0  | 0.0 | 0.4      | 0.0            | 0.0 | 0.0 |
| <i>Succinispira</i>        | 0.0  | 0.0 | 0.0      | 0.0            | 0.0 | 0.0 |
| <i>Sulfuricurvum</i>       | 0.0  | 0.0 | 0.0      | 0.0            | 0.0 | 0.0 |
| <i>Sulfurimonas</i>        | 0.0  | 0.0 | 0.0      | 0.0            | 0.0 | 0.0 |
| <i>Sulfurospirillum</i>    | 0.0  | 0.0 | 0.0      | 0.0            | 0.0 | 0.0 |
| <i>Sulfurovum</i>          | 0.0  | 0.0 | 0.0      | 0.0            | 0.0 | 0.2 |
| <i>Synechococcus</i>       | 0.0  | 0.0 | 0.0      | 0.0            | 0.0 | 0.6 |
| <i>Syntrophobacter</i>     | 0.0  | 0.0 | 0.0      | 0.0            | 0.0 | 0.0 |
| <i>Syntrophococcus</i>     | 0.0  | 0.0 | 0.0      | 0.0            | 0.0 | 0.0 |
| <i>Syntrophomonas</i>      | 0.0  | 0.0 | 0.0      | 0.1            | 0.0 | 0.0 |
| <i>Syntrophorhabdus</i>    | 0.0  | 0.0 | 0.0      | 0.0            | 0.0 | 0.0 |
| <i>Tahibacter</i>          | 0.0  | 0.0 | 0.0      | 0.0            | 0.0 | 0.0 |
| <i>Taibaiella</i>          | 0.0  | 0.0 | 0.0      | 0.0            | 0.0 | 0.0 |
| <i>Tepidimicrobium</i>     | 0.0  | 0.0 | 0.0      | 0.0            | 0.0 | 0.0 |
| <i>Terrimonas</i>          | 0.0  | 0.0 | 0.0      | 0.0            | 0.0 | 0.0 |
| <i>Tessaracoccus</i>       | 0.0  | 0.0 | 0.0      | 0.1            | 0.0 | 0.0 |
| <i>Thalassospira</i>       | 0.0  | 0.0 | 0.0      | 0.0            | 0.0 | 0.0 |
| <i>Thauera</i>             | 0.0  | 0.0 | 0.0      | 0.0            | 0.0 | 0.0 |
| <i>Thermincola</i>         | 0.0  | 0.0 | 0.0      | 0.0            | 0.0 | 0.0 |
| <i>Thermoanaerobaculum</i> | 0.0  | 0.0 | 0.0      | 0.0            | 0.0 | 0.0 |
| <i>Thermodesulfobium</i>   | 0.0  | 0.0 | 0.0      | 0.0            | 0.0 | 0.0 |

Supplementary Figure S2, continued

| Genus                     | S1a  | Zoo | Hospital | Slaughterhouse | S1b  | S1c  |
|---------------------------|------|-----|----------|----------------|------|------|
| <i>Thermomonas</i>        | 0.2  | 0.5 | 0.0      | 0.0            | 0.0  | 0.0  |
| <i>Thermus</i>            | 0.0  | 0.0 | 0.0      | 0.0            | 0.0  | 0.0  |
| <i>Thiobaca</i>           | 0.0  | 0.0 | 0.0      | 3.1            | 0.0  | 0.0  |
| <i>Thiorhodospira</i>     | 0.0  | 0.0 | 0.0      | 0.0            | 0.0  | 0.1  |
| <i>Thiothrix</i>          | 0.0  | 0.0 | 1.8      | 0.0            | 0.0  | 0.0  |
| <i>Tissierella</i>        | 0.0  | 0.6 | 0.0      | 0.3            | 0.0  | 0.0  |
| <i>Tolumonas</i>          | 0.0  | 0.0 | 0.1      | 0.0            | 0.1  | 0.0  |
| <i>Trichococcus</i>       | 0.0  | 0.0 | 0.0      | 0.0            | 0.0  | 0.0  |
| <i>Tropicimonas</i>       | 0.0  | 0.0 | 0.0      | 0.0            | 0.0  | 0.1  |
| <i>Truepera</i>           | 0.0  | 0.0 | 0.0      | 0.0            | 0.0  | 0.1  |
| <i>Trueperella</i>        | 0.0  | 0.0 | 0.0      | 0.0            | 0.0  | 0.0  |
| <i>Tumebacillus</i>       | 0.1  | 0.0 | 0.0      | 0.0            | 0.0  | 0.0  |
| <i>Turicibacter</i>       | 0.1  | 0.0 | 0.1      | 0.0            | 0.0  | 0.0  |
| <i>Turneriella</i>        | 0.0  | 0.0 | 0.0      | 0.0            | 0.0  | 0.0  |
| <i>Uliginosibacterium</i> | 0.0  | 0.0 | 0.0      | 0.0            | 0.0  | 0.0  |
| <i>Unassigned</i>         | 15.1 | 8.6 | 28.4     | 33.0           | 65.6 | 66.5 |
| <i>Undibacterium</i>      | 0.0  | 0.0 | 0.0      | 0.0            | 0.4  | 0.0  |
| <i>Ureaplasma</i>         | 0.0  | 0.0 | 0.0      | 0.0            | 0.0  | 0.0  |
| <i>Ureibacillus</i>       | 0.0  | 0.0 | 0.0      | 0.2            | 0.0  | 0.0  |
| <i>Uruburuella</i>        | 0.0  | 0.0 | 0.1      | 0.0            | 0.0  | 0.0  |
| <i>Vagococcus</i>         | 0.0  | 0.1 | 0.0      | 0.2            | 0.0  | 0.0  |
| <i>Variibacter</i>        | 0.1  | 0.0 | 0.0      | 0.0            | 0.0  | 0.0  |
| <i>Veillonella</i>        | 0.0  | 0.0 | 0.1      | 0.1            | 0.0  | 0.0  |
| <i>Vibrio</i>             | 0.0  | 0.0 | 0.0      | 0.0            | 0.0  | 0.4  |
| <i>Vitreoscilla</i>       | 0.0  | 0.1 | 0.0      | 0.0            | 0.0  | 0.0  |
| <i>Vogesella</i>          | 0.0  | 0.0 | 0.0      | 0.0            | 0.2  | 0.0  |
| <i>Vulcanibacillus</i>    | 0.0  | 0.0 | 0.0      | 0.0            | 0.0  | 0.0  |
| <i>Weeksella</i>          | 0.0  | 0.1 | 0.0      | 0.1            | 0.0  | 0.0  |
| <i>Weissella</i>          | 0.0  | 0.0 | 0.1      | 0.9            | 0.0  | 0.0  |
| <i>Wohlfahrtiimonas</i>   | 0.0  | 0.1 | 0.0      | 0.1            | 0.0  | 0.0  |
| <i>Woodsholea</i>         | 0.0  | 0.0 | 0.1      | 0.0            | 0.0  | 0.0  |
| <i>Xanthobacter</i>       | 0.0  | 0.0 | 0.4      | 0.0            | 0.0  | 0.0  |
| <i>Zeaxanthinibacter</i>  | 0.0  | 0.0 | 0.0      | 0.0            | 0.0  | 0.1  |
| <i>Zhangella</i>          | 0.0  | 0.0 | 0.0      | 0.0            | 0.0  | 0.0  |
| <i>Zoogloea</i>           | 0.1  | 0.0 | 0.1      | 0.0            | 0.6  | 0.0  |
| <i>Zymomonas</i>          | 0.1  | 0.0 | 0.0      | 0.0            | 0.0  | 0.0  |
| Total                     | 100  | 100 | 100      | 100            | 100  | 100  |
